# Supplementary material for: Controllable synthesis of “L”-shaped V2O5and the improved adsorption capacity by fluorine
Source: Royal Society of Chemistry journal article supplement (doi:10.1039/c6ce00079g), 2016-01-01
Supplement: c6ce00079g1.pdf [file c6ce00079g1.pdf]

Supporting information for

## **Controllable synthesis of “L”-shaped V<sub>2</sub>O<sub>5</sub> and the improved adsorption capacity by fluorine**

Yang Yang, Fei Teng\*, Yandong Kan, Liming Yang, Wenhao Gu, Juan Xu, Yunxuan Zhao, Xi Du, Ming Ren

Jiangsu Engineering and Technology Research Center of Environmental Cleaning Materials (ECM), Jiangsu Key Laboratory of Atmospheric Environment Monitoring and Pollution Control (AEMPC), Jiangsu Joint Laboratory of Atmospheric Pollution Control (APC), Collaborative Innovation Center of Atmospheric Environment and Equipment Technology (AEET), School of Environmental Science and Engineering, Nanjing University of Information Science & Technology, 219 Ningliu Road, Nanjing

---

\* Corresponding author. Tel./Fax.: +86-25-9882-1090; Email address: tfwd@163.com

**Table S1.** Atomic concentration (*at%*)

| <b>Atomic species</b> | <b>C 1s</b> | <b>O 1s</b> | <b>V2p</b> | <b>F 1s</b> |
|-----------------------|-------------|-------------|------------|-------------|
| <b>F1</b>             | 84.99       | 2.77        | 10.53      | 1.71        |
| <b>F2</b>             | 74.78       | 19.31       | 4.49       | 1.42        |
| <b>F3</b>             | 60.74       | 29.35       | 8.22       | 1.69        |

**Fig. S1**

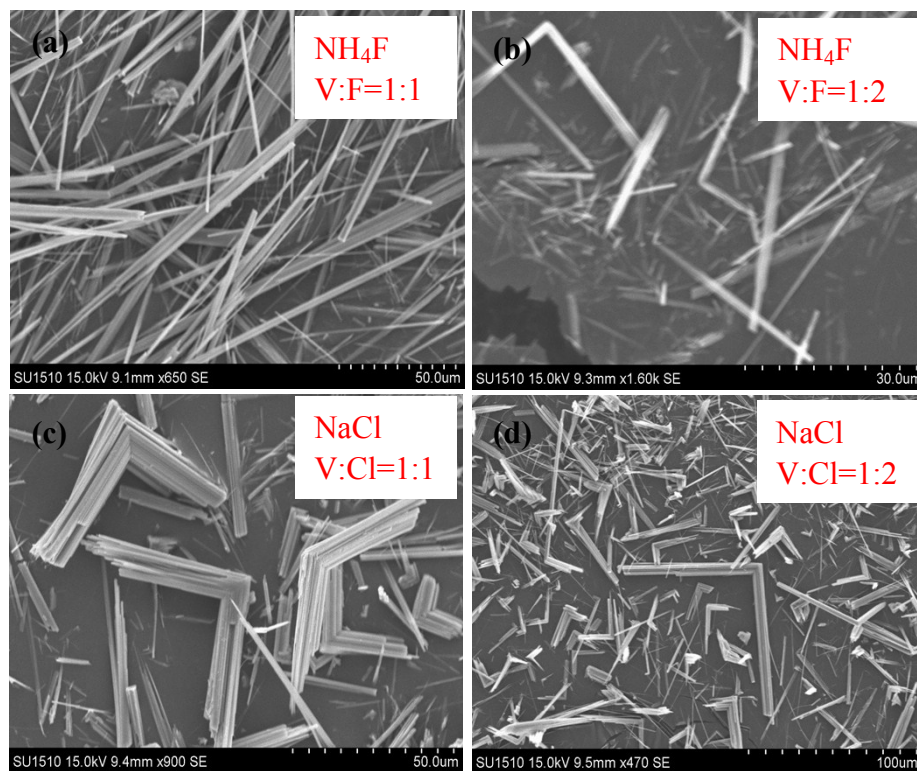

**Fig. S1** Effects of  $NH_4F$  and  $NaCl$  on the morphology of  $V_2O_5$ .

Fig. S2

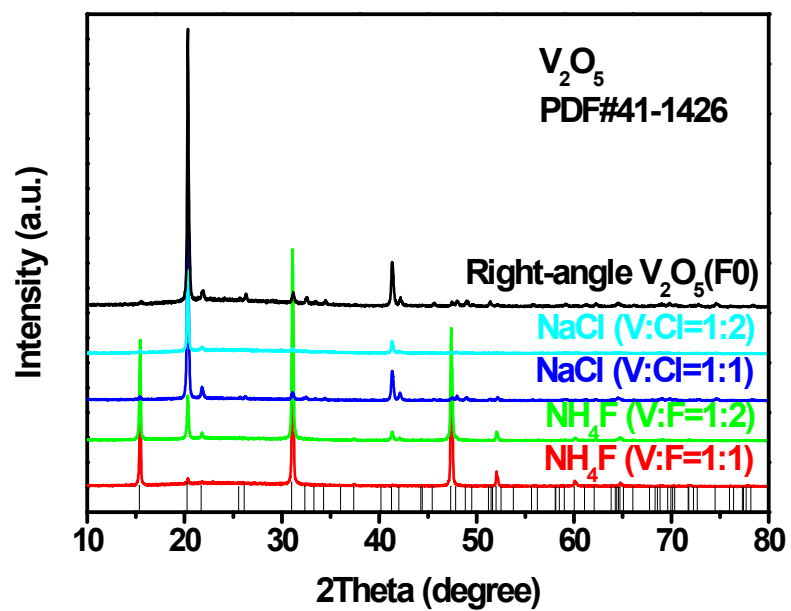

Fig. S2 The XRD patterns of  $V_2O_5$  samples synthesized in different system.

Fig. S3

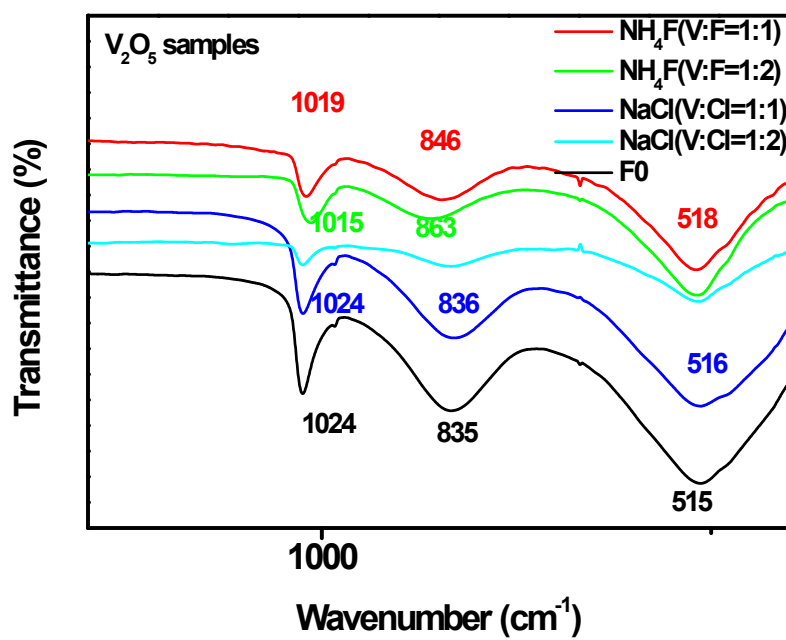

Fig. S3 FT-IR spectrum of V<sub>2</sub>O<sub>5</sub> samples in different systems.

Fig. S4

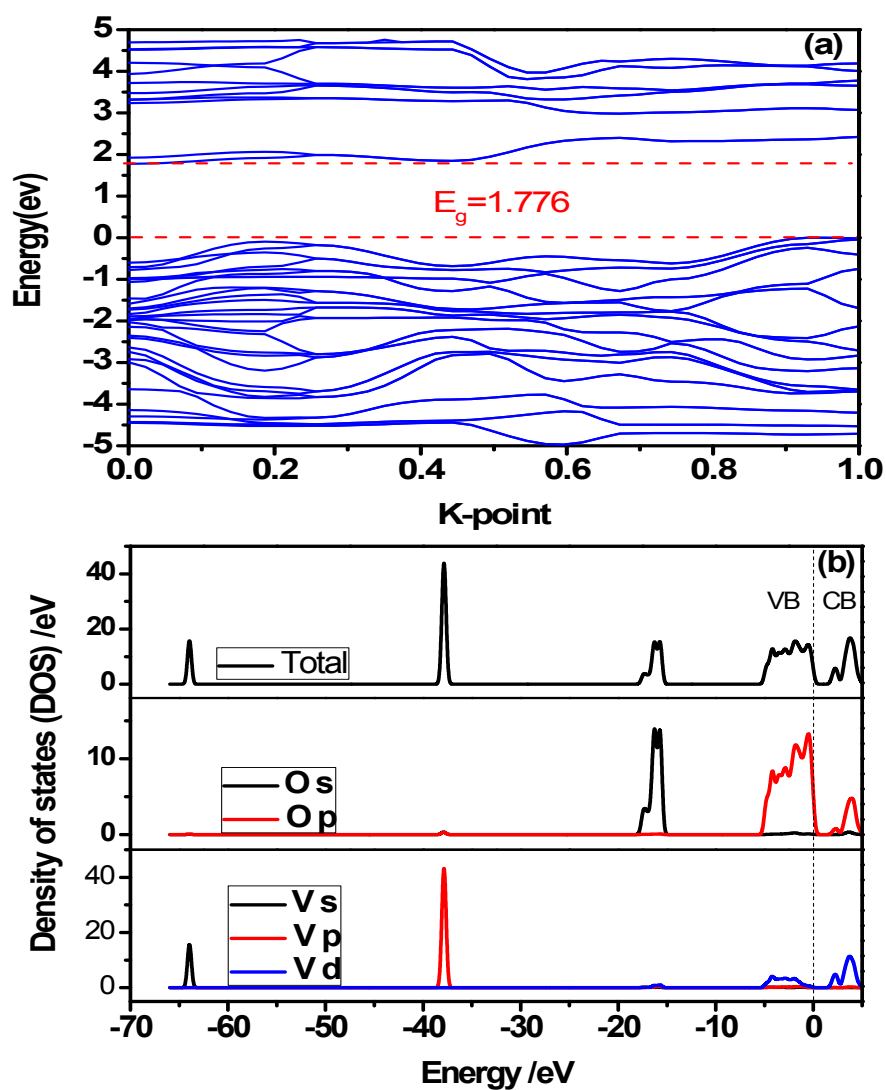

Fig. S4 Band structure and density of states for pure  $V_2O_5$ : (a) band structure, (b) DOS.

From Fig. S4b, we can see that for  $V_2O_5$ , the top edge of valence band (VB) is attributed to the O 2p and the partial V 3d orbitals, and the bottom edge of conduction band (CB) is attributed to the V 3d and the partial O 2p orbitals.
